# Supplementary material
Source: PubMed Central journal article supplement (PMC4538878)
Supplement: supp_115.224428_224428_suppl_fig_1.pdf [file supp_115.224428_224428_suppl_fig_1.pdf]

Role of dopamine type 1 receptors and DARPP-32 in D<sup>9</sup>-THC-mediated induction of  $\Delta$ FosB in the mouse forebrain

Matthew F. Lazenka, Aaron J. Tomarchio, Aron H. Lichtman, Paul Greengard, Marc Flajolet, Dana E. Selley, Laura J. Sim-Selley

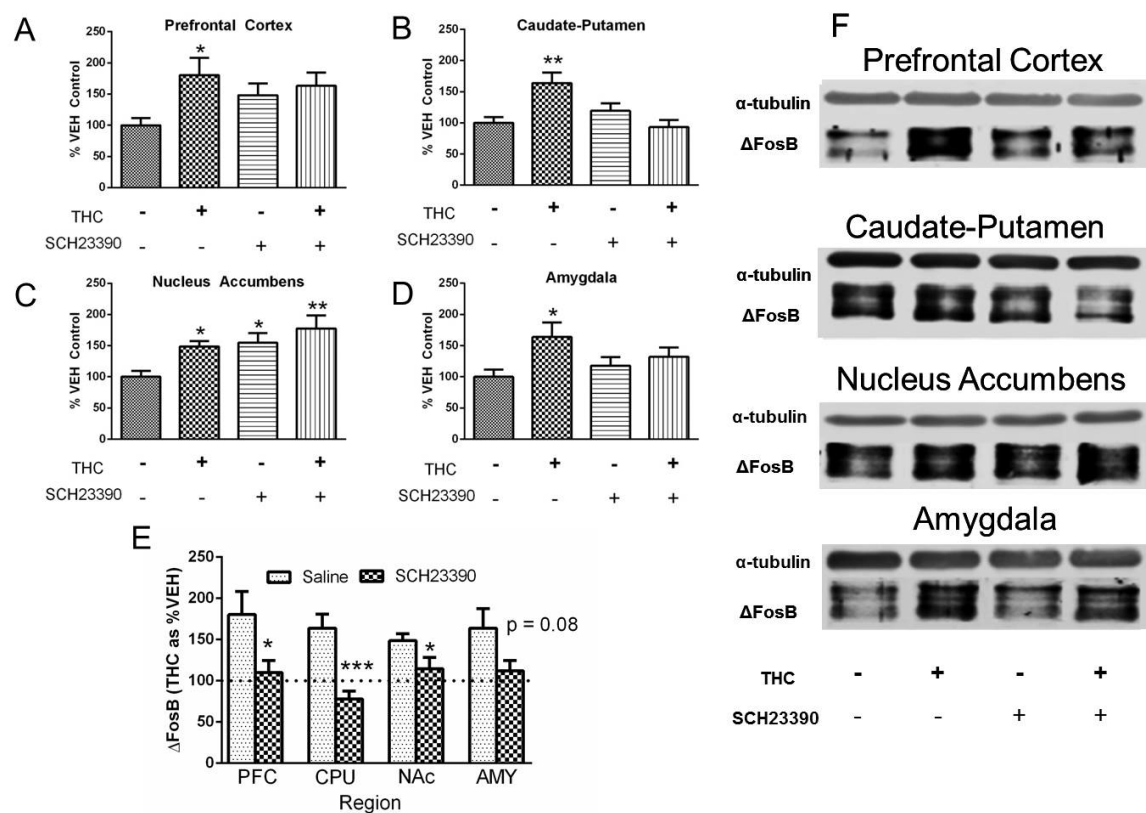

Supplemental Figure 1. SCH23390 inhibits  $\Delta$ FosB induction by repeated THC treatment but induces  $\Delta$ FosB in nucleus accumbens. Mice were injected with the D<sub>1</sub>R antagonist SCH23390 or saline followed by THC or vehicle as described in Methods, and  $\Delta$ FosB expression was determined in the prefrontal cortex (A), caudate-putamen (B), nucleus

accumbens (C) and amygdala (D). Data are  $\Delta$ FosB-ir/ $\alpha$ -tubulin-ir ratio, expressed as mean % saline/vehicle-treated mice  $\pm$  SEM (n = 7-8 per group). Panel E shows the comparisons of induction of  $\Delta$ FosB by THC, with data expressed as mean percent vehicle in saline- and SCH23390-pretreated mice. Representative immunoblots are shown in F.

\*\* p < 0.01, \*\*\*p < 0.001 compared to saline/vehicle mice (A-D); \* p < 0.05 and \*\*\* p < 0.001 compared to saline by Student's T-test (E). PFC (prefrontal cortex), CPU (caudate-putamen), NAc (nucleus accumbens), AMY (amygdala).
